# Supplementary material for: The Importance of AGO 1 and 4 in Post-Transcriptional Gene Regulatory Function of tRF5-GluCTC, an Respiratory Syncytial Virus-Induced tRNA-Derived RNA Fragment
Source: PubMed Central journal article supplement (PMC7699471; doi:10.3390/ijms21228766), 2020-11-20
Supplement: ijms-21-08766-s001.pdf [file ijms-21-08766-s001.pdf]

### Supplementary Table S1. Primers for qRT-PCR

| <b>Primer Name</b> | <b>Sequence (5' to 3')</b> |
|--------------------|----------------------------|
| AGO1 forward       | CAGTGGACACCAACATCACC       |
| AGO1 reverse       | AAACGGTTGTCATCCCAAAG       |
| AGO2 forward       | CCGGCCTTCTCTCTGGAAAA       |
| AGO2 reverse       | GCCTTGTAACGCTGTTGCT        |
| AGO3 forward       | ATCCCAGCTGGAACAACAGT       |
| AGO3 reverse       | GCGTACGTAAGTGTGGCAGA       |
| AGO4 forward       | AGTTGCTTGTGTTTGCACCTCAGA   |
| AGO4 reverse       | ATTTTACGCAGCTGGTCAGTGA     |
| 18S forward        | ACATCCAAGGAAGGCAGCAG       |
| 18S reverse        | TCGTCACTACCTCCCCGG         |
